# Supplementary material
Source: bioRxiv or medRxiv preprint supplement (https://www.biorxiv.org/highwire/filestream/2256/field_highwire_adjunct_files/1/008862-10.pdf)

Normalised beta value

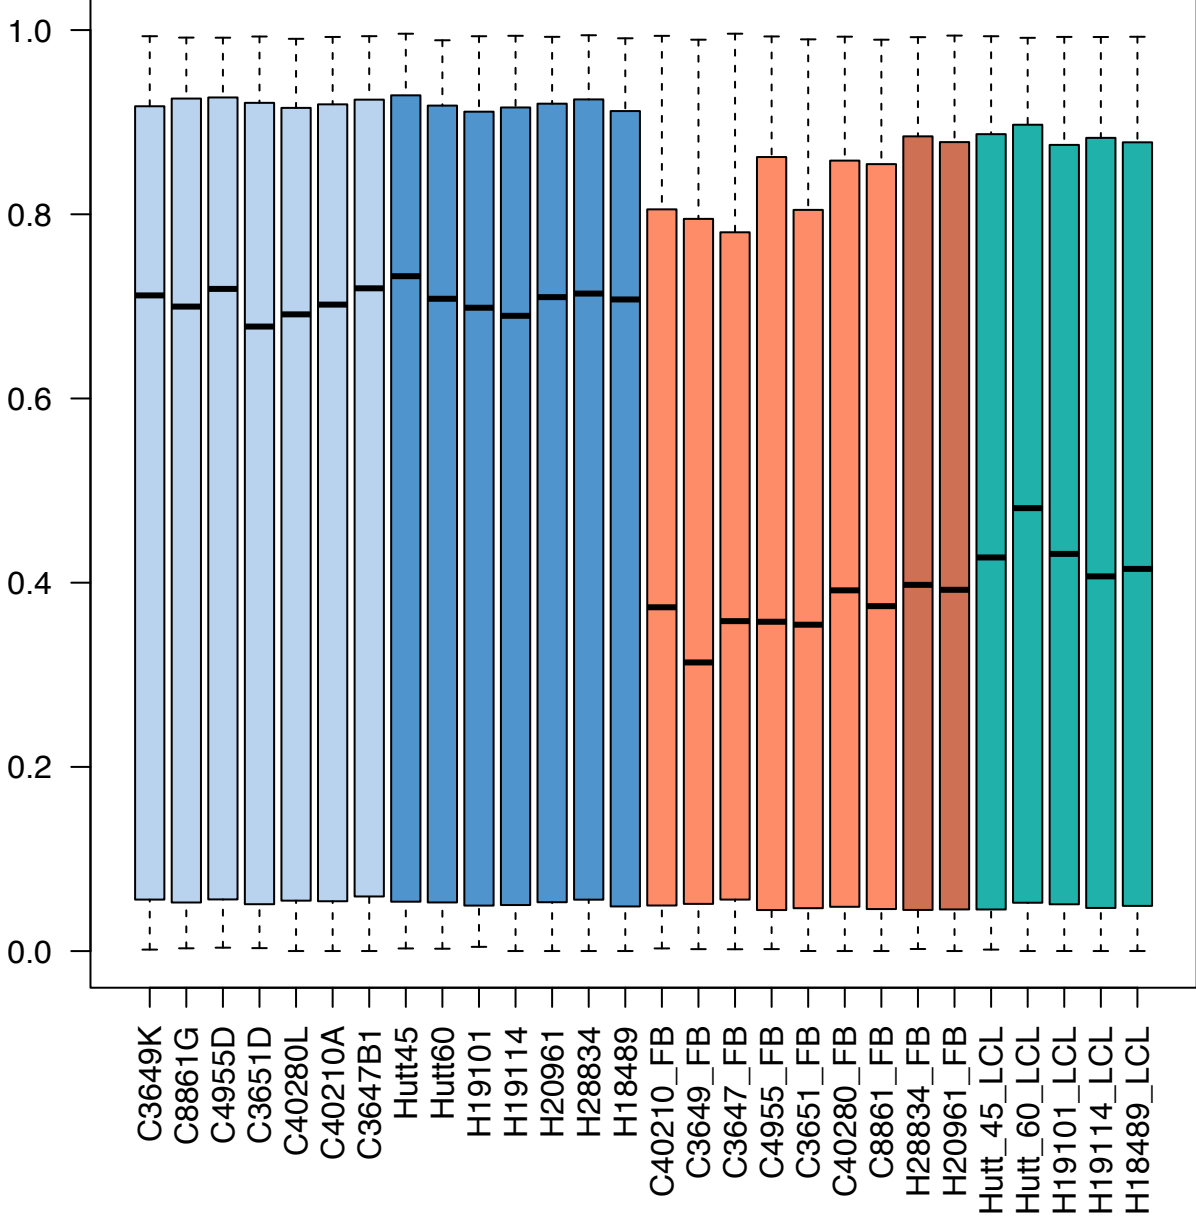

Supplement: Supplementary file [file 008862-10.pdf]
